# Supplementary material
Source: PubMed Central journal article supplement (PMC10594193)
Supplement: NIHMS1932106-supplement-8.pdf [file NIHMS1932106-supplement-8.pdf]

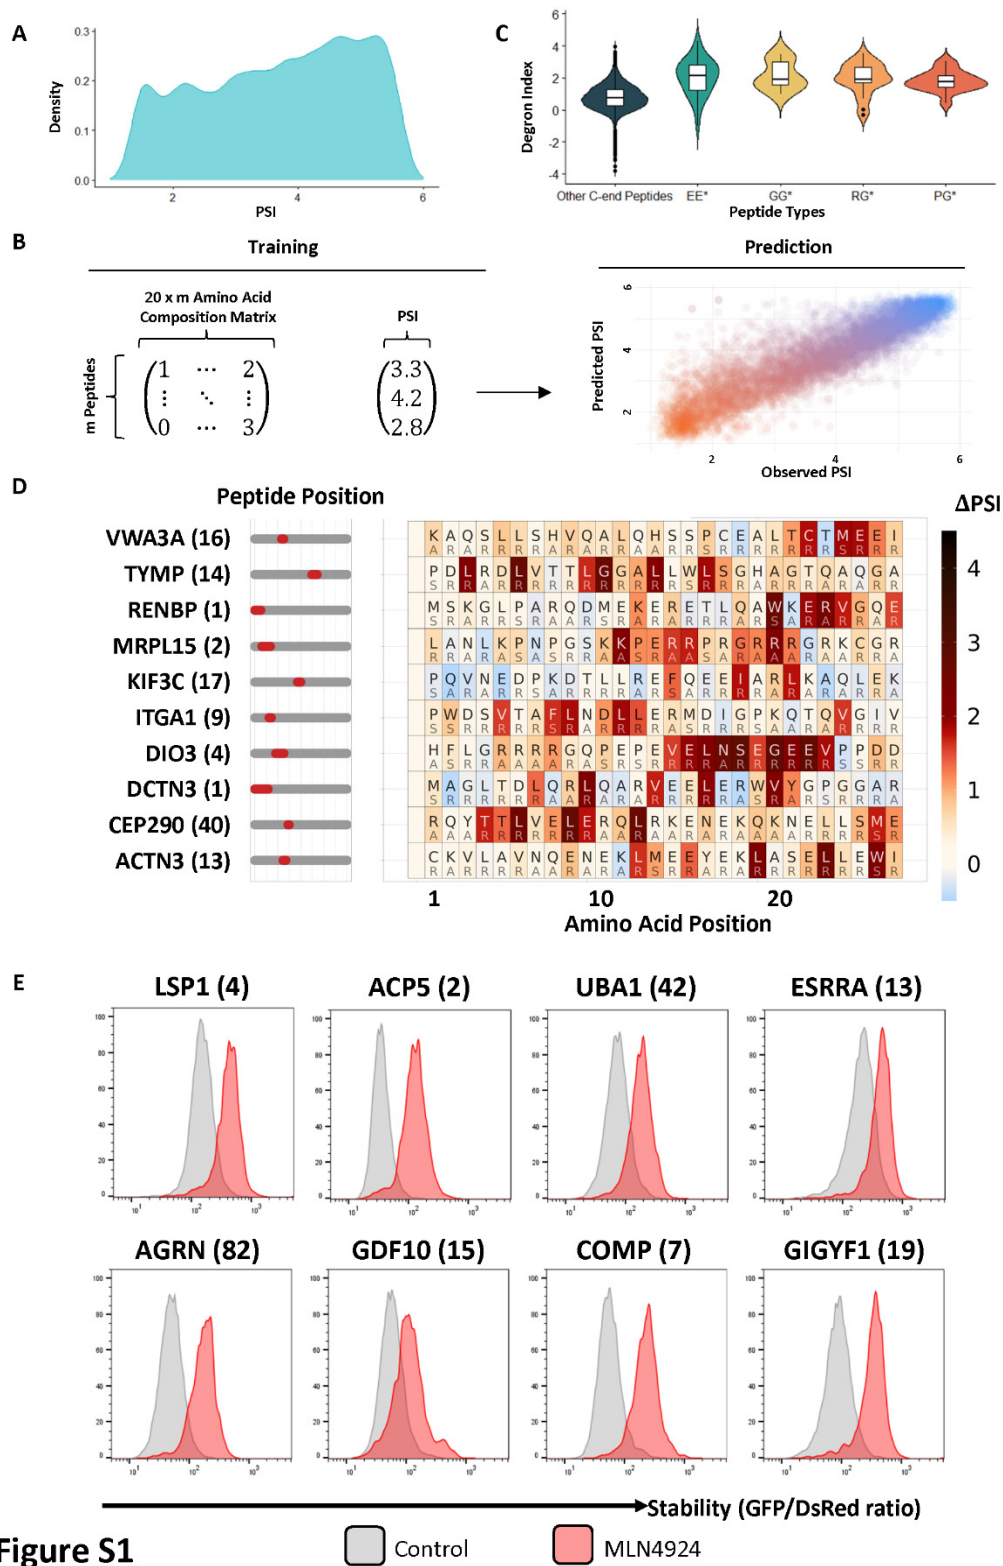

Figure S1

**Figure S1. GPS-peptidome screen identified many unstable peptides. Related to Figure 1, Figure 2, and Figure 3.**

- (A) Distribution of the PSI of individual peptides.
- (B) Schematic diagram illustrating the workflow of SVM machine learning. Correlations between the experimentally observed PSIs and machine learning predict the PSI of each peptide is shown for 10K randomly selected peptides which are depicted as dots. Dots above the diagonal deviate from the predicted PSI and are candidates that may contain degrons.
- (C) Population of peptides containing known degrons<sup>14</sup> (EE\*, GG\*, RG\*, PG\*) have significantly larger degron indexes than the distribution of the other C-end peptides from the 28-mer peptidome library. Degron index = Predicted PSI – Observed PSI.
- (D) Scanning mutagenesis of representative non-CRL degron peptides with diverse degron motifs. The darker the color, the larger the degree of stabilization by the corresponding mutation
- (E) Eight representative peptides identified as responsive to MLN4924 were individually examined by treatment with 1 uM MLN4924 for 24 h to assay stability as denoted by the GFP/DsRed ratio.

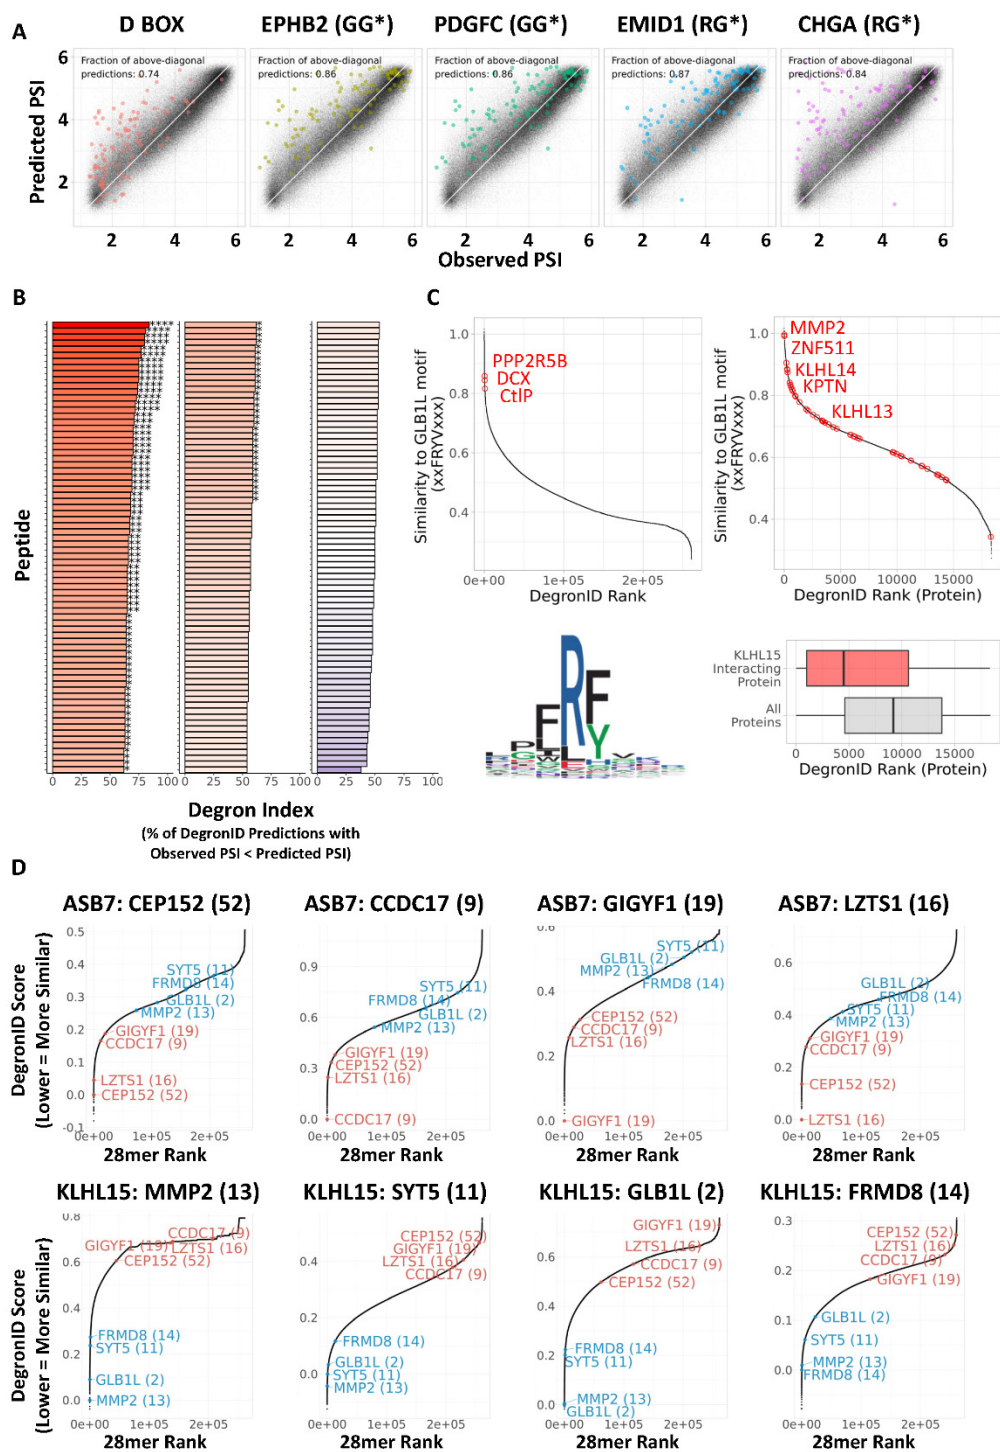

**Figure S2**

**Figure S2. Degron ID classified saturation mutagenesis motifs into clusters based on their sequence similarities. Related to Figure 4.**

- (A) Benchmarking of the DegronID method. For D-box degrons from APC/C, along with saturation mutagenesis heatmaps from previously characterized C-terminal degrons the DegronID algorithm was performed and the 200 peptides that most closely resemble the starting motif are colored.
- (B) 219 individual degron prediction models sorted by percentage of the top 200 predicted hits from each degron prediction model that are less stable than expected based on amino acid composition. Asterisks indicate FDR significance level (\*\*\*\* FDR < 0.0001, \*\*\* FDR < 0.001, \*\* FDR < 0.01, \* FDR < 0.1). Significance calculated relative to a null distribution defined by repeated random sampling of 100 peptides from our library and enumeration from each of the resultant random samples what percentage of randomly selected peptides are less stable than expected based on amino acid composition.
- (C) Benchmarking of the DegronID algorithm. (Top left). Substrates known to be degraded by KLHL15, marked in red, score in the top 0.2% of our library for similarity to the GLB1L(2) FRYV motif characterized in our study. (Top right). Distribution of BioPlex 3.0 KLHL15 interacting proteins compared to all human proteins in our library for similarity to the GLB1L(2) FRYV motif. (Bottom right) Boxplot showing that KLHL15 interacting proteins skew towards scoring as similar to the GLB1L(2) FRYV motif. (Bottom left) FR[FY] motif obtained from sequence alignment of KLHL15 interacting proteins, using sequence intervals from each protein that score as most similar to GLB1L(2) by DegronID.
- (D) Illustration of ranked degron similarity search based on DegronID score for eight selected degrons with validated cognate E3 either ASB7 (top, red) or KLHL15 (bottom, blue). X axis indicates rank of the 260k peptides in our library, y axis indicates DegronID score for each peptide. Peptides for the eight selected degrons are colored and labelled, with color indicating cognate E3.

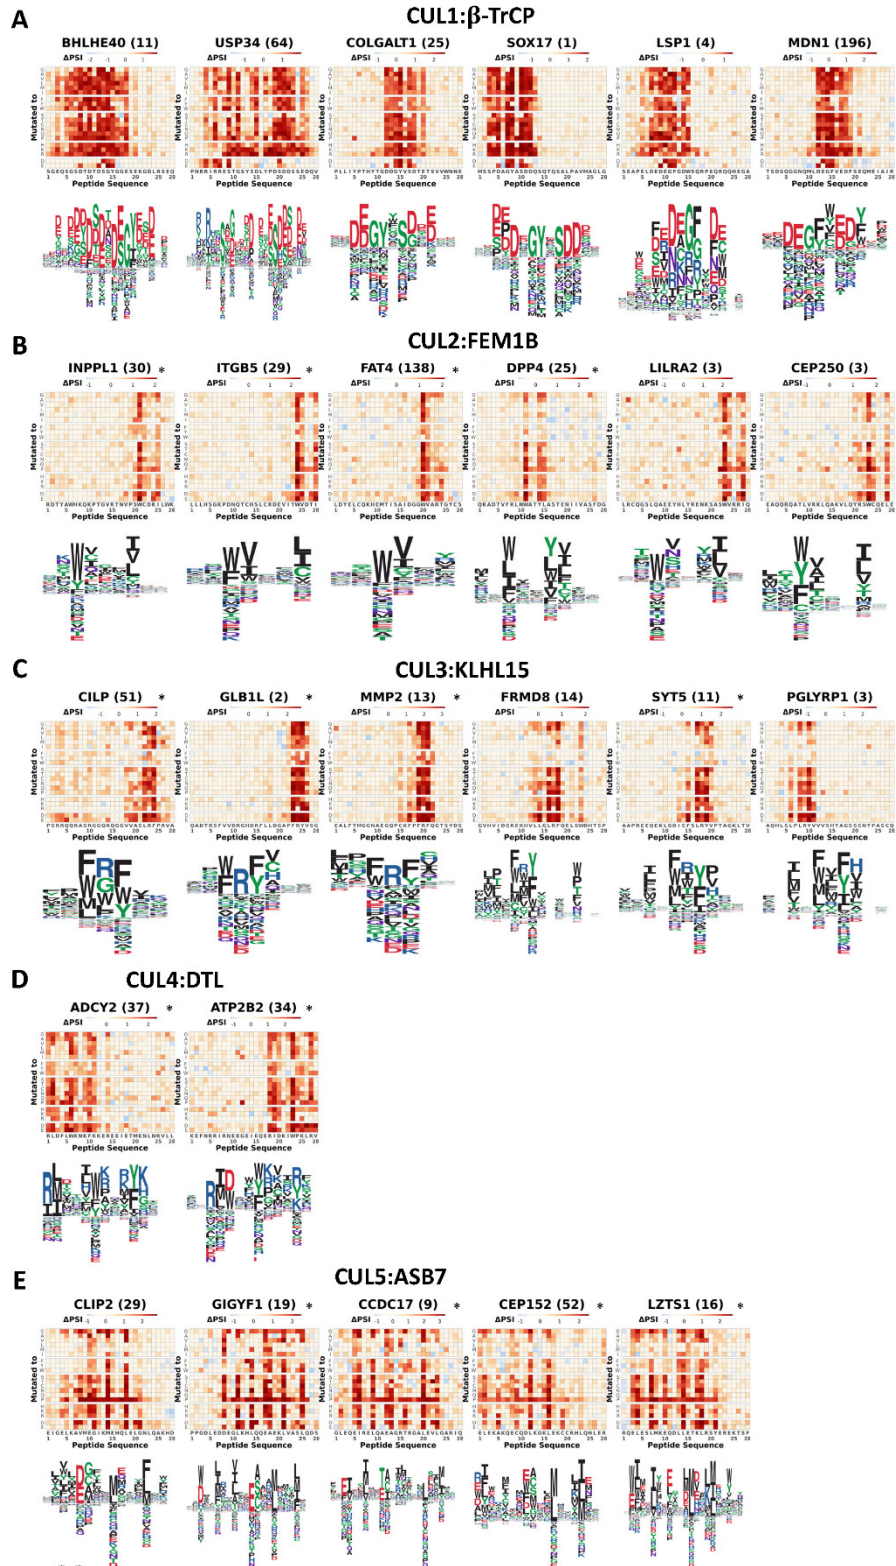

Figure S3

**Figure S3. DegronID predicted peptides with similar degron motifs in the same cluster. Related to Figure 5.**

For each meta-cluster indicated in Figure 4, including (A) CUL1: $\beta$ -TrCP, (B) CUL2:FEM1B, (C) CUL3:KLHL15, (D) CUL4: DTL, (E) CUL5:ASB7, the mutagenesis heatmaps and logo plots of selected peptides with similar motifs were shown. Individual peptides mapped by CRISPR screening, or validated to be the substrates of the corresponding cognate E3 ligase were marked with asterisks.

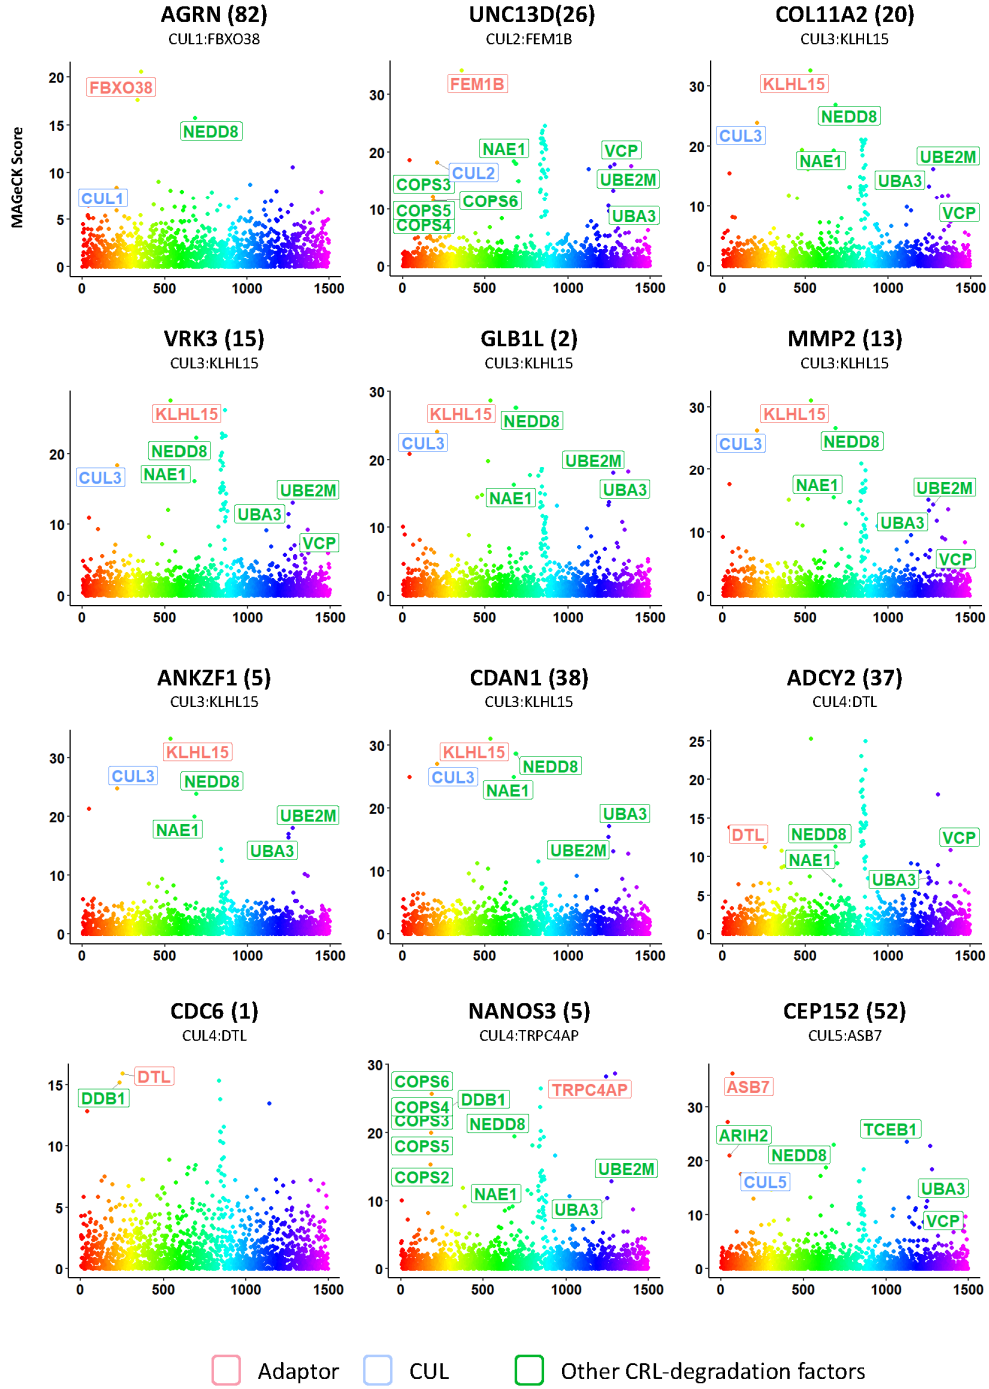

Figure S4

**Figure S4. Additional CRISPR screens that identified the cognate E3 ligases for CRL-degron peptides. Related to Figure 6.**

For each indicated peptide, CRISPR screening results are shown. For the CRISPR screens, the results were first analyzed by MAGECK and the significantly enriched Cullin-adaptor pairs were identified and shown (Table S7; see STAR Methods for details).



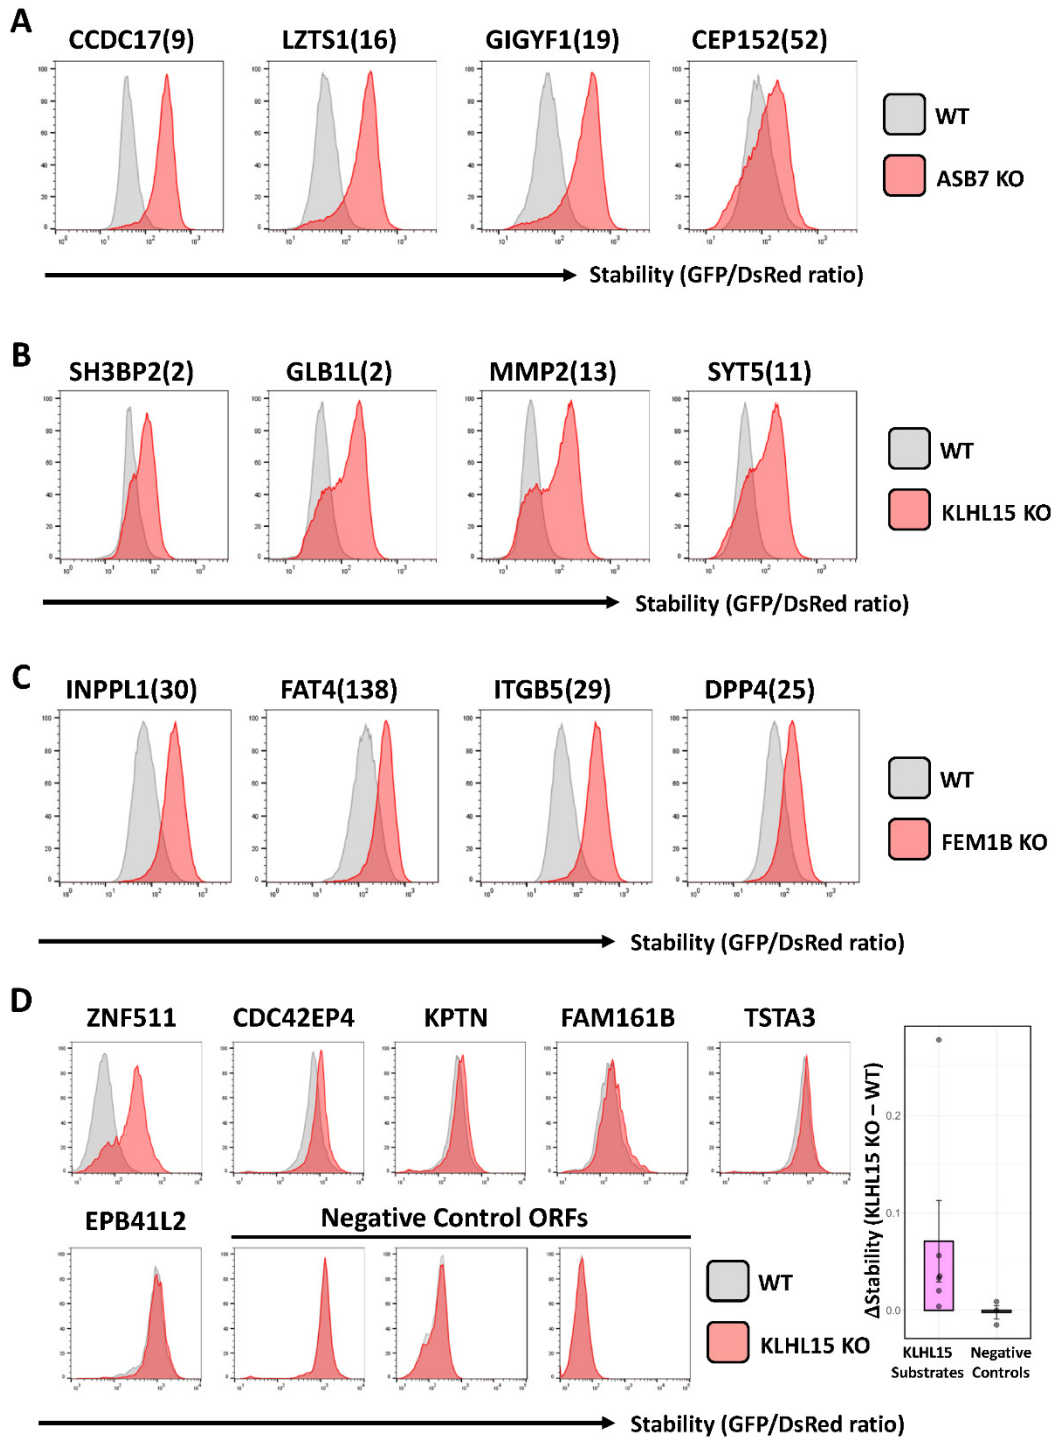

Figure S5

**Figure S5. Selected CRL-degron peptides encoding similar motifs were validated as substrates of the same cognate E3 ligase individually. Related to Figure 6.**

Peptides encoding motifs resembling that of (A) ASB7; (B) KLHL15; (C) FEM1B were individually validated as the substrate of the E3 ligase by comparing their stabilities in WT and E3 KO condition. The KO was generated by lentiviral infection of an sgRNA targeting the CRL-adaptor, followed by puromycin selection to select the cells expressing the sgRNA. (D) ORFs containing motifs for KLHL15 and identified in BioPlex 3.0 as KLHL15 interacting proteins were individually validated as KLHL15 substrates by comparing their stabilities in WT and KLHL15 KO cells. Three other randomly selected proteins lacking a FRY-like domain or any known association to KLHL15 were also measured as negative controls. In the bar plot to the right, each point represents the change in modal stability between the KLHL15 KO vs. WT cells for one ORF. Putative KLHL15 substrates are gathered on the left column, overlaying the pink bar, and negative control ORFs overlay the grey bay. The bar heights represent the mean of all points in that group. Error bars represent standard error of the mean.

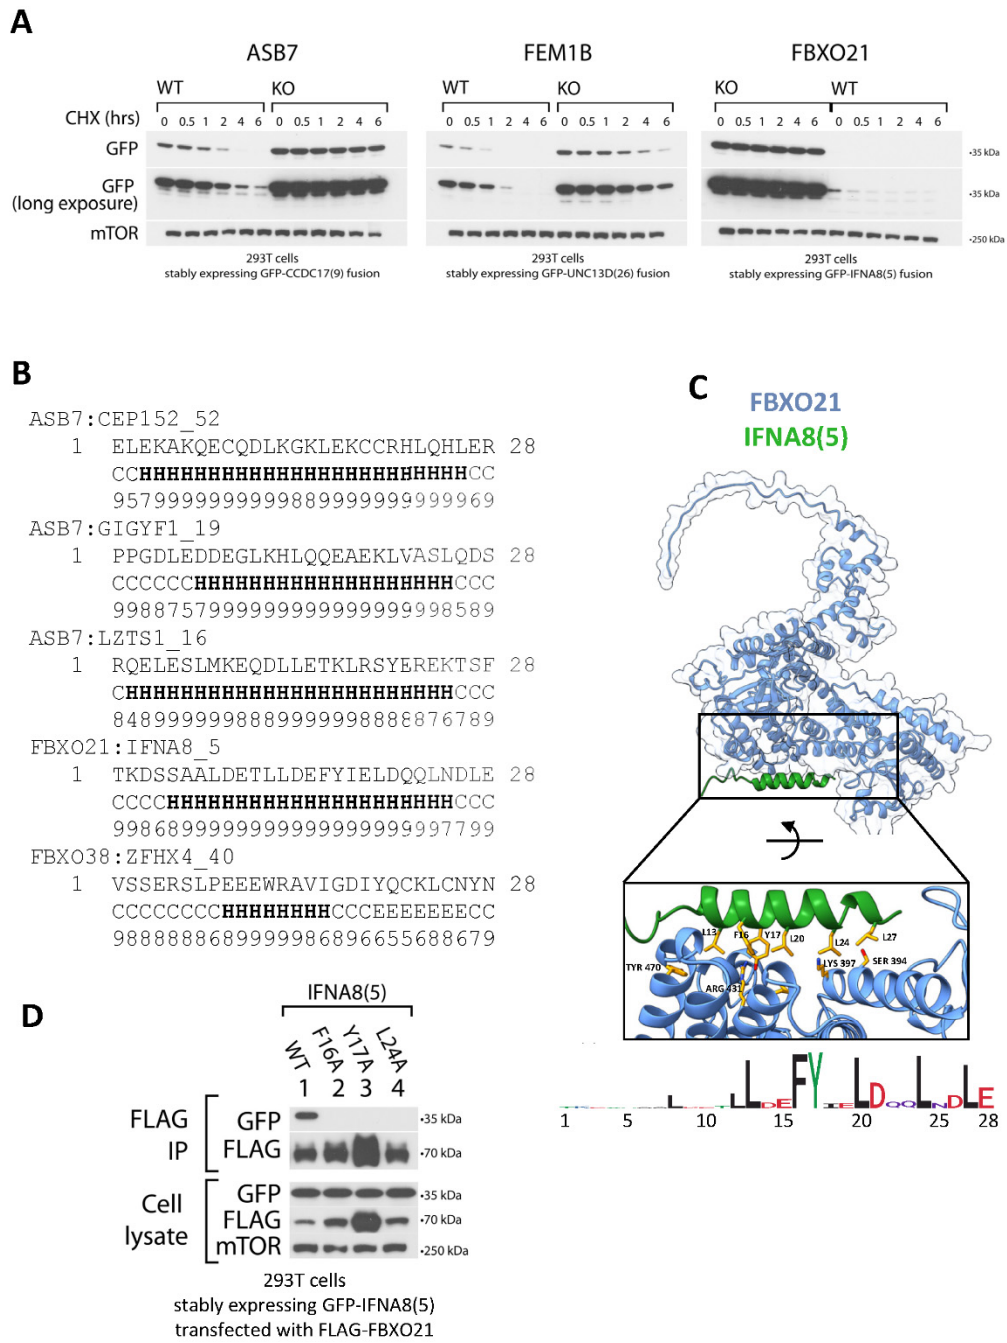

Figure S6

**Figure S6. Half-life assay, peptides regulated by FBXO38, FBXO21 and ASB7 are predicted to encode alpha-helical structures by secondary structure prediction program PROTEUS2. Related to Figure 7.**

- (A) Cycloheximide chase immunoblot for FBXO21:IFNA8(5), ASB7:CCDC17(9), and FEM1B:UNC13D(26).
- (B) Alpha-helical structure predictions are shown for the indicated peptides.
- (C) Docking structure for FBXO21:IFNA8(5) as predicted by AlphaFold2. Sidechains of critical degron residues mapped by saturation mutagenesis are shown and labelled with single-letter amino acid codes. Sidechains of potential degron-interacting FBXO21 residues are shown and labelled with three-letter amino acid codes.
- (D) Co-immunoprecipitation immunoblot data for FBXO21 KO 293T cells stably expressing IFNA8(5) (WT or mutant) fused to GFP and transfected with Flag-FBXO21.

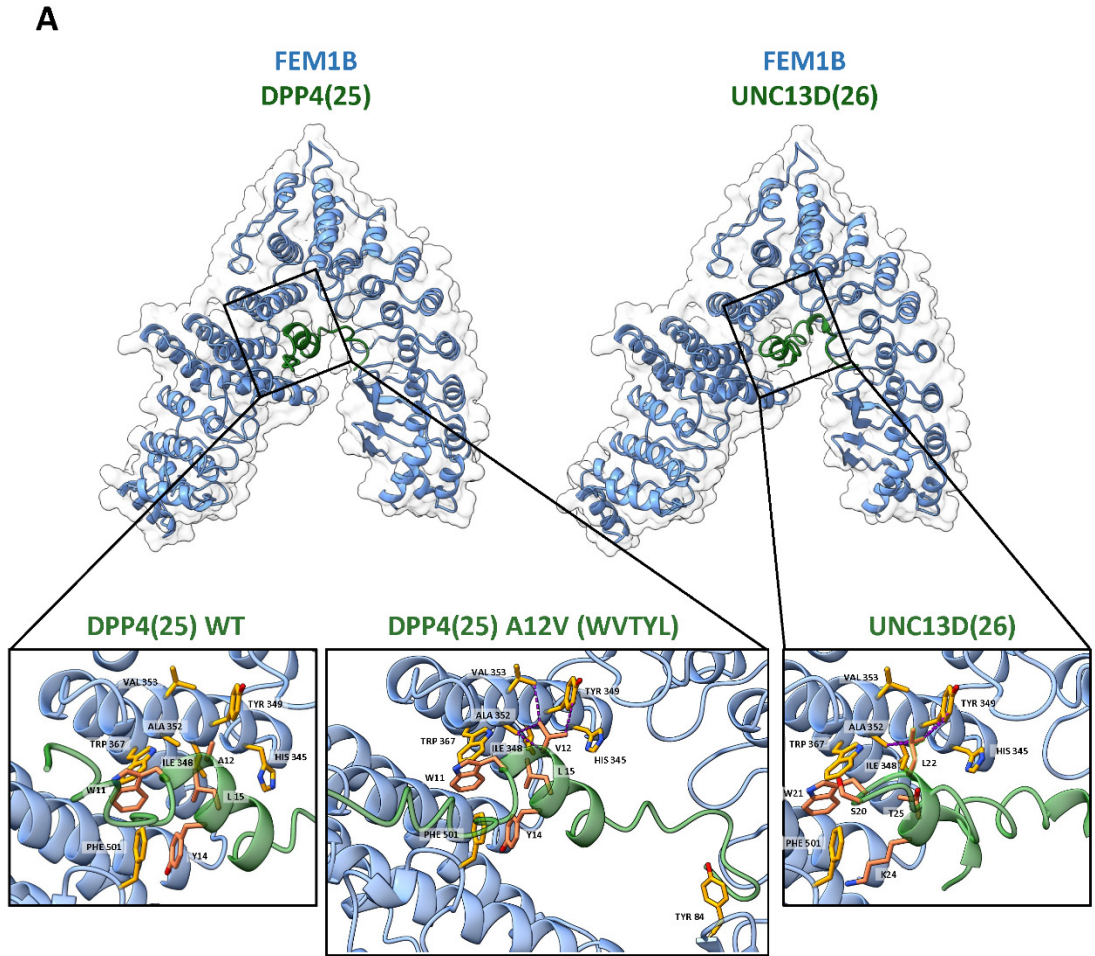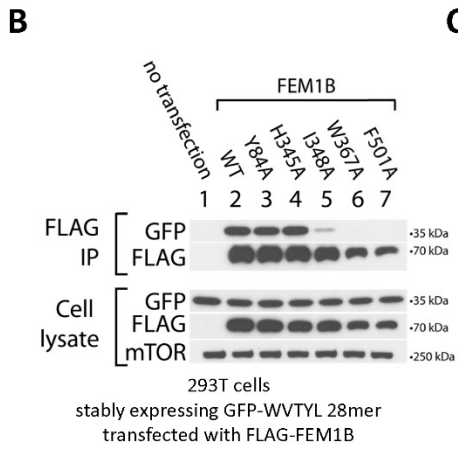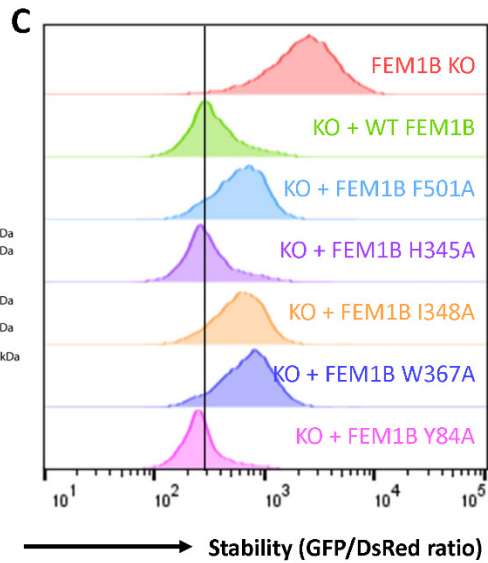

**Figure S7**

**Figure S7. E3-degron docking by AlphaFold2 identified critical degron residues consistent with that revealed by saturation mutagenesis, co-immunoprecipitation, and GPS. Related to Figure 7.**

- (A) Docking structures for FEM1B to identified degron peptides from DPP4(25) and UNC13D(26). In the zoomed-in windows, candidate critical residues on both the ligase and degron are highlighted. For DPP4(25), docking for WT peptide (...WATYL...) and optimized mutant peptide (...WVTYL...) are shown. Shown degron residues are labelled with single-letter amino acid codes. Sidechains of FEM1B residues that were mutagenized in validation experiments are shown and labelled with three-letter amino acid codes. Purple dashed lines indicate atomic contacts made by FEM1B with DPP4(25) A12, WVTYL 28mer V12, or UNC13D(26) L22. Contacts were identified through ChimeraX as intermolecular pairs of atoms with VDW overlap  $> -0.4\text{\AA}$ , which produced similar results to using atomic center-center distance  $< 4.0\text{\AA}$ .
- (B) Co-immunoprecipitation immunoblot data for FEM1B KO 293T cells stably expressing an optimized FEM1B degron peptide (...WVTYL...) fused to GFP and transfected with Flag-FEM1B (WT or mutant).
- (C) Flow stability data for GFP-optimized FEM1B degron peptide (...WVTYL...) with KO, stably expressed WT or stably expressed mutant FEM1B. The residues Y84 and H345 do not touch the degron and their mutations show WT stability and continue to bind the degron peptide as expected.
